# Supplementary material
Source: publisher figshare collection journal article supplement (https://acs.figshare.com/ndownloader/files/4618747)
Supplement: Supplementary file 1 [file 4618747]

Supporting information for:  
Amino Modified Diamond as a Highly Durable Stationary Phase for Solid Phase  
Extraction

Gaurav Saini<sup>1</sup>, Li Yang<sup>1</sup>, Milton L. Lee<sup>1</sup>, Andrew Dadson<sup>2</sup>, Michael Vail<sup>2</sup>, Matthew R.  
Linford<sup>1\*</sup>

<sup>1</sup>Department of Chemistry and Biochemistry, Brigham Young University, Provo, UT  
84602, <sup>2</sup>US Synthetic Corporation, Orem, UT

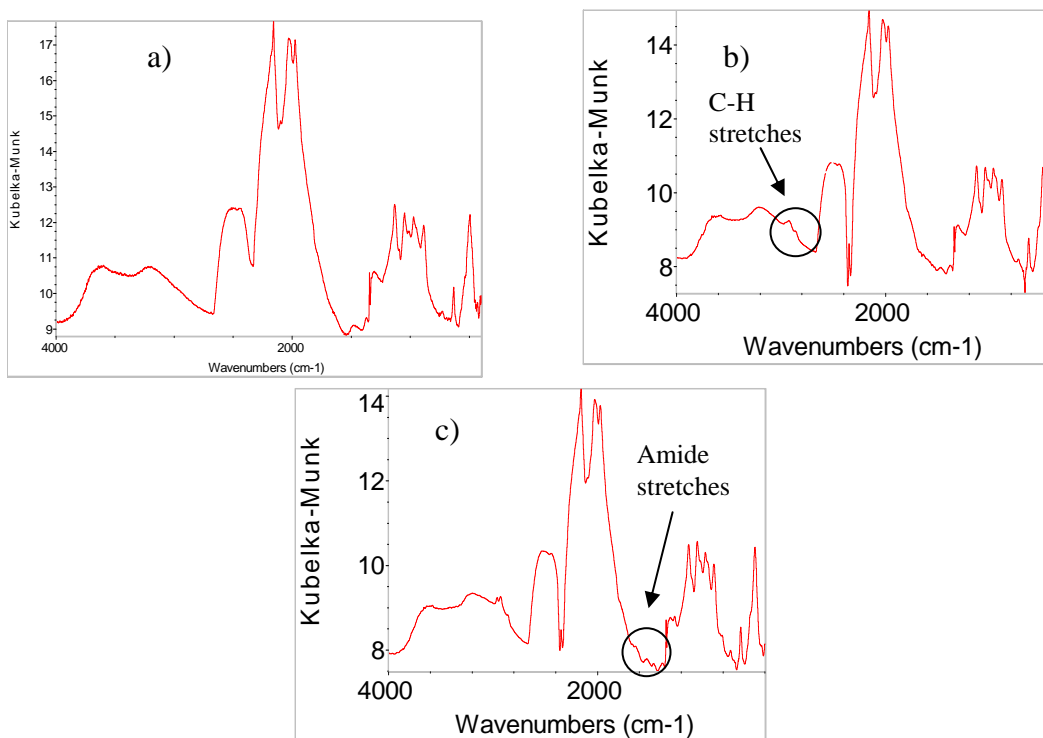

Supporting Information Figure 1. FTIR spectra of the piranha cleaned (a), PAAm functionalized (b), and cured PAAm functionalized (c) diamond powder. The large peaks in the area around 2000 cm<sup>-1</sup>, and again at lower energy, are due to the large size of the diamond powder used in the DRIFT experiment, and are not chemically significant in this study.

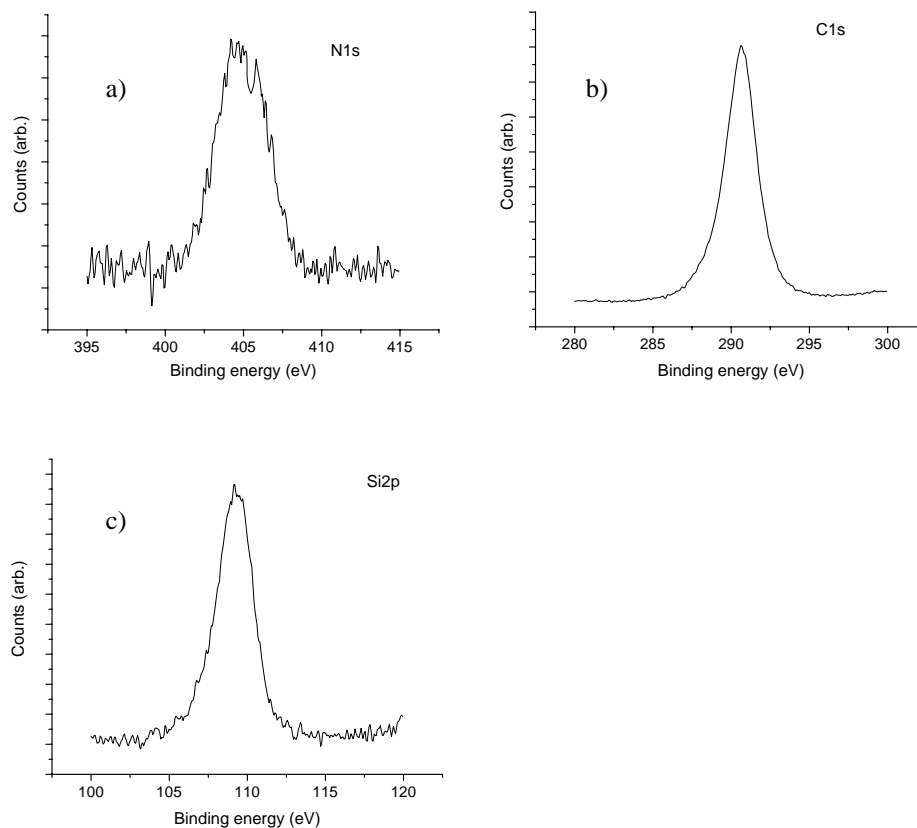

Supporting information Figure 2. Representative narrow scans (a) N 1s and (b) C 1s regions of PAAm coated diamond, and the (c) Si 2p region of a commercially available, silica-based SPE sorbent.
